# Supplementary material for: Electrically programmable digital memory behaviors based on novel functional aromatic polyimide/TiO2hybrids with a high ON/OFF ratio
Source: Royal Society of Chemistry journal article supplement (doi:10.1039/c3tc32580f), 2014-01-01
Supplement: c3tc32580f.pdf [file c3tc32580f.pdf]

## Supporting Information

### Electrically Programmable Digital Memory Behaviors Based on Novel Functional Aromatic Polyimide/TiO<sub>2</sub> Hybrids with High ON/OFF Ratio

By Chih-Jung Chen,<sup>+</sup> Chia-Liang Tsai,<sup>+</sup> and Guey-Sheng Liou\*

Functional Polymeric Materials Laboratory, Institute of Polymer Science and Engineering,  
National Taiwan University, Taipei, Taiwan

Tel: +886-2-336-5315; Fax: +886-2-336-5237; E-mail: [gслиou@ntu.edu.tw](mailto:gслиou@ntu.edu.tw)

[+] The authors contributed equally to this work

#### List of Contents for Supplementary Material:

---

|                                                                                                                               |              |
|-------------------------------------------------------------------------------------------------------------------------------|--------------|
| <b>Figure S1.</b> IR spectra of the studied films (a) <b>3SOH-6FPI</b> and (b) <b>3STP-50</b> .....                           | <u>SI-2</u>  |
| <b>Figure S2.</b> <sup>1</sup> H NMR spectrum of polyimide <b>3SOH-6FPI</b> .....                                             | <u>SI-3</u>  |
| <b>Figure S3.</b> TGA thermograms of <b>3SOH-6FPI</b> hybrid materials (a) in N <sub>2</sub> (b) in air.....                  | <u>SI-4</u>  |
| <b>Figure S4.</b> TMA thermogram of <b>3SOH-6FPI</b> hybrid materials.....                                                    | <u>SI-5</u>  |
| <b>Figure S5.</b> UV-visible absorption spectrum of <b>3SOH-6FPI</b> .....                                                    | <u>SI-6</u>  |
| <b>Figure S6.</b> Cyclic voltammetric diagram of <b>3SOH-6FPI</b> film on an ITO-coated glass substrate over cyclic scan..... | <u>SI-7</u>  |
| <b>Figure S7.</b> Current-voltage (I-V) characteristics of the ITO/ <b>3STP-5</b> /Al memory device. ..                       | <u>SI-8</u>  |
| <b>Figure S8.</b> Current-voltage (I-V) characteristics of the ITO/ <b>3STP-50</b> /Al memory device. <u>SI-9</u>             | <u>SI-9</u>  |
| <b>Table S1.</b> Inherent Viscosities and GPC Data of <b>3SOH-6FPI</b> .....                                                  | <u>SI-10</u> |
| <b>Table S2.</b> Solubility of <b>3SOH-6FPI</b> .....                                                                         | <u>SI-10</u> |

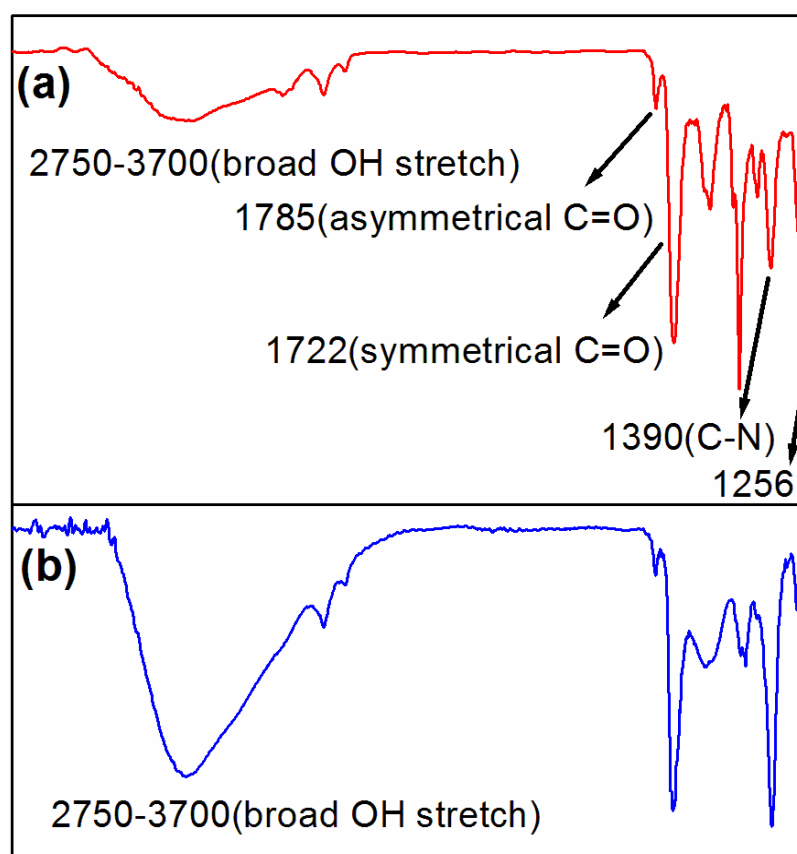

**Figure S1.** IR spectra of the studied films (a) 3SOH-6FPI and (b) 3STP-50.

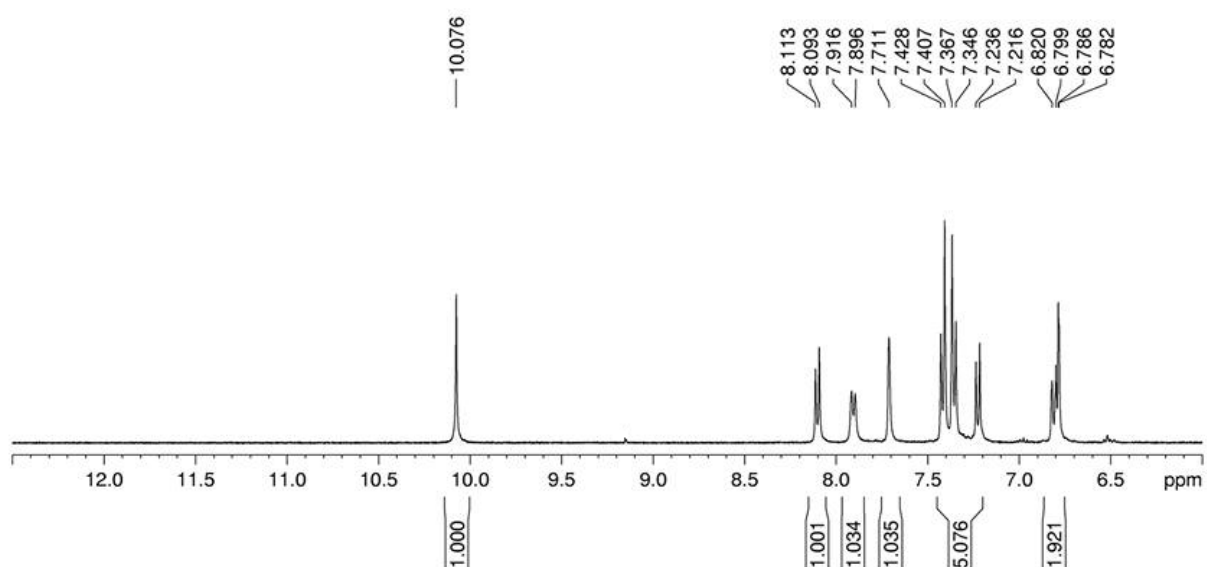

**Figure S2.**  $^1\text{H}$  NMR spectrum of polyimide **3SOH-6FPI**.

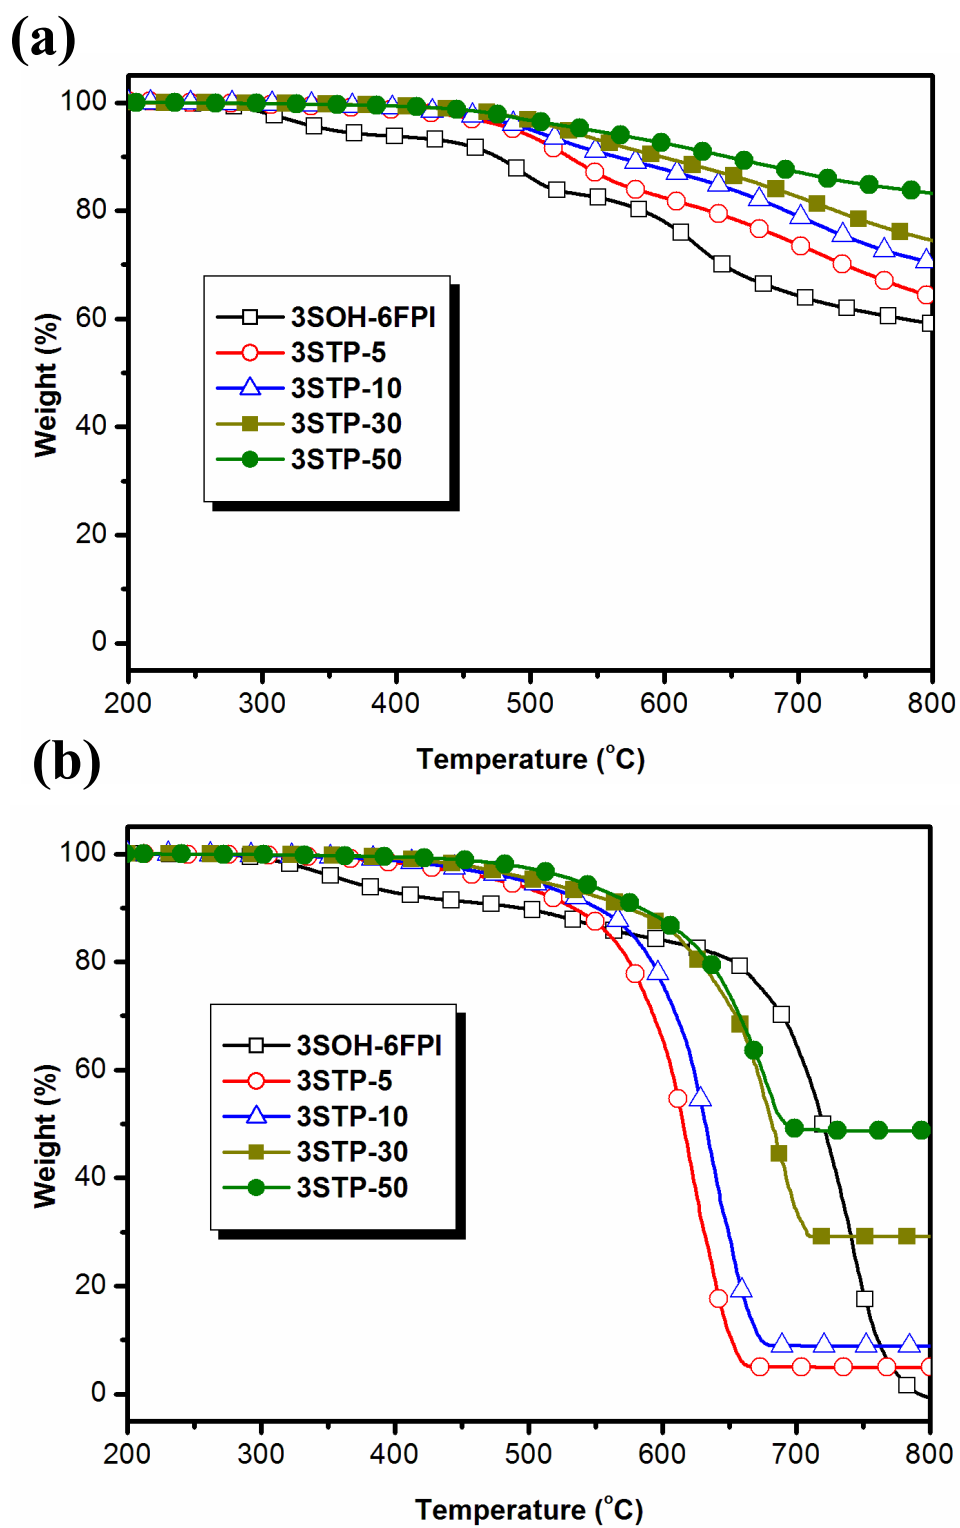

Figure S3. TGA thermograms of 3SOH-6FPI hybrid materials (a) in N<sub>2</sub> (b) in air.

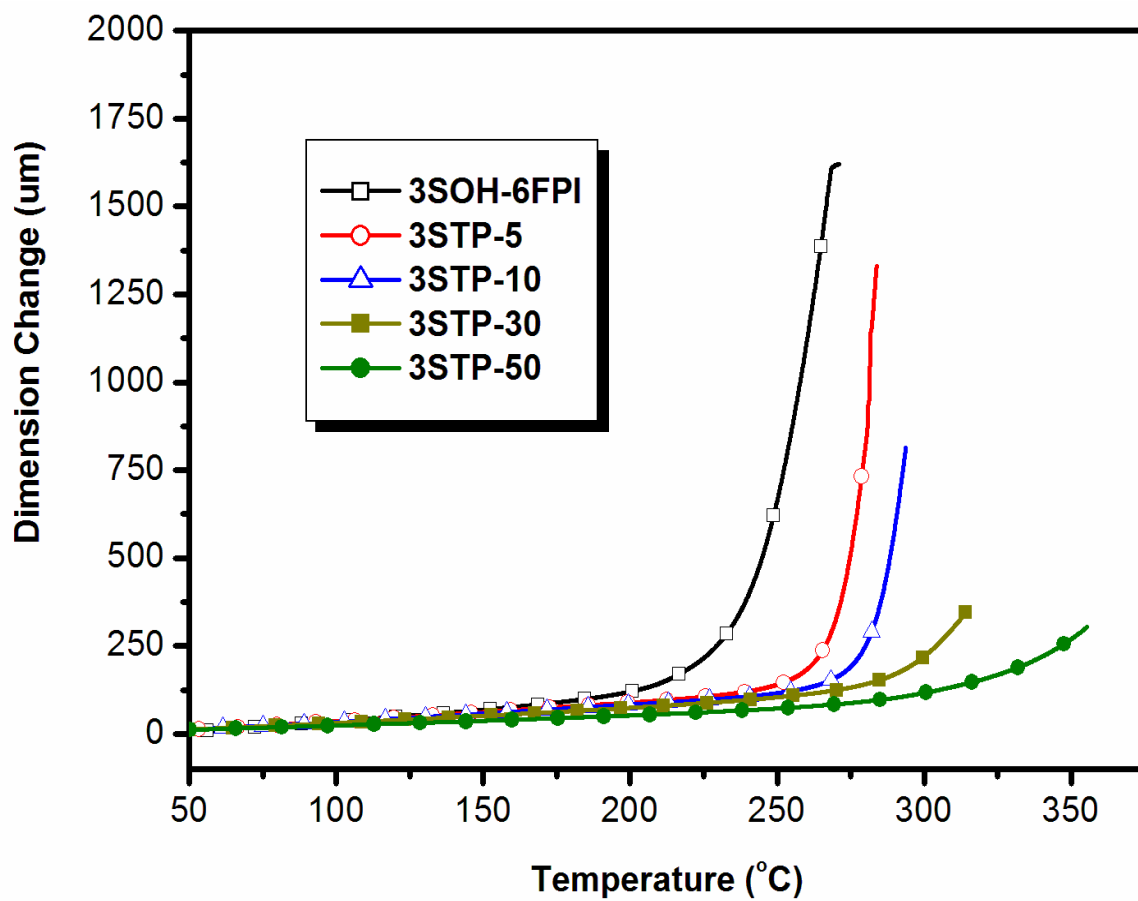

Figure S4. TMA thermogram of 3SOH-6FPI hybrid materials.

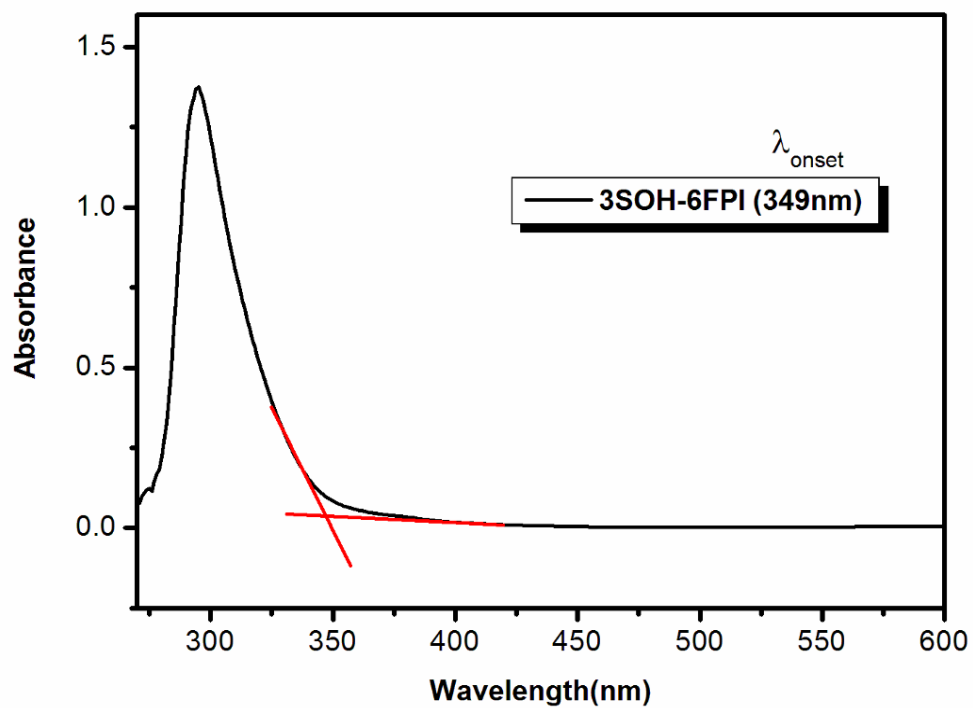

**Figure S5.** UV-visible absorption spectrum of 3SOH-6FPI.

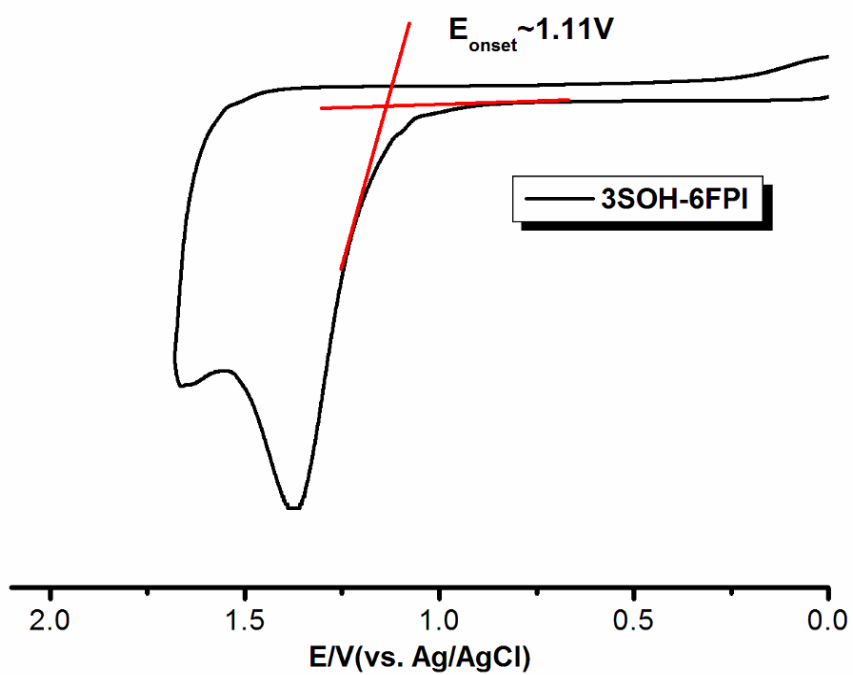

**Figure S6.** Cyclic voltammogram of 3SOH-6FPI film on an ITO-coated glass substrate over cyclic scan.

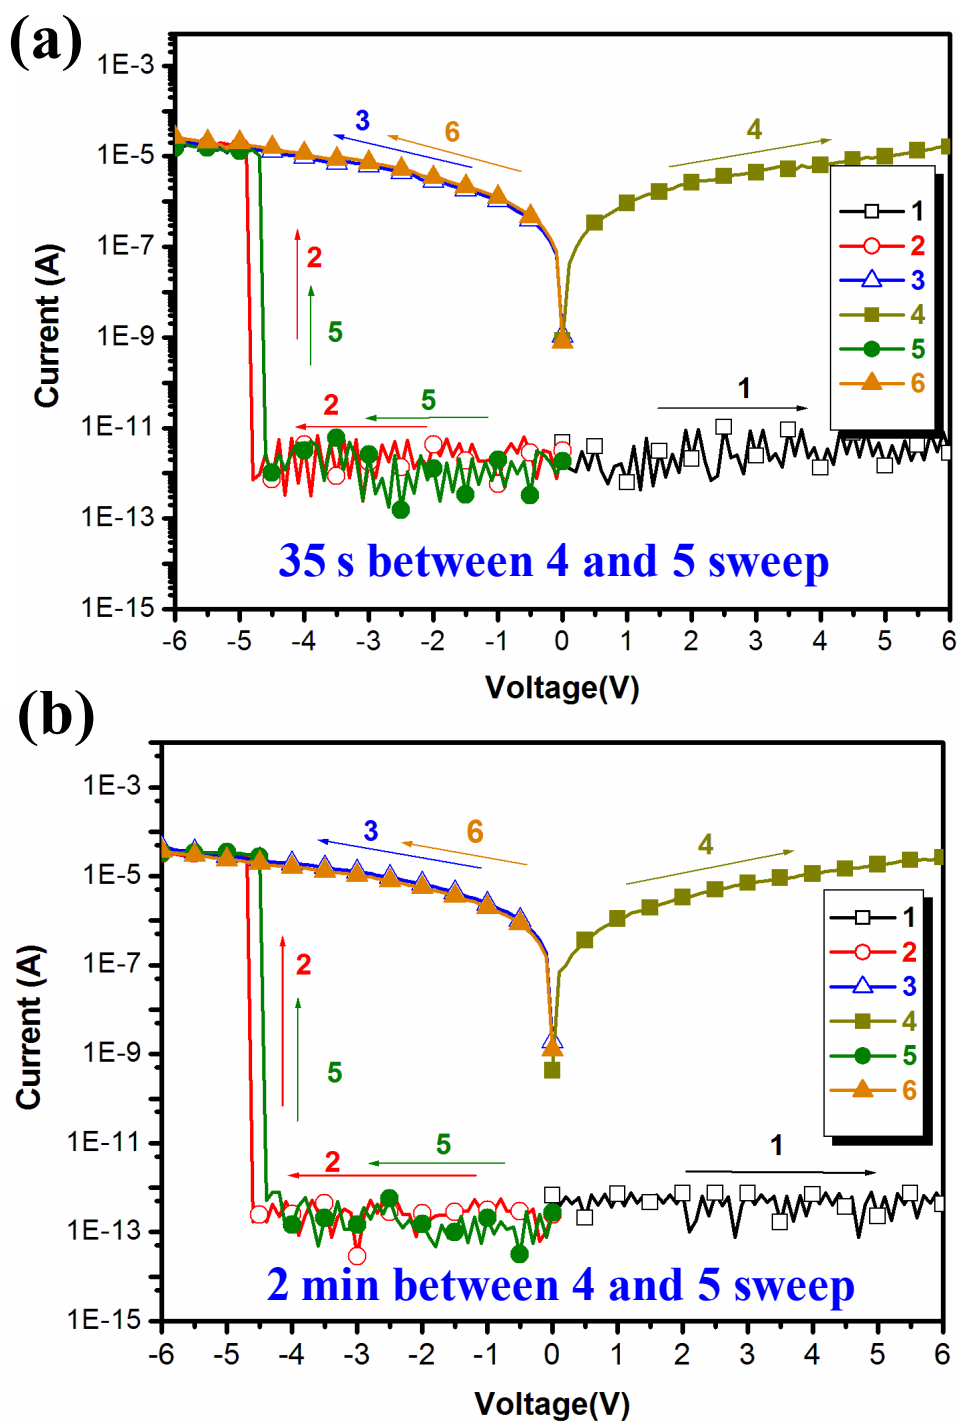

Figure S7. Current-voltage (I-V) characteristics of the ITO/3STP-5/Al memory device.



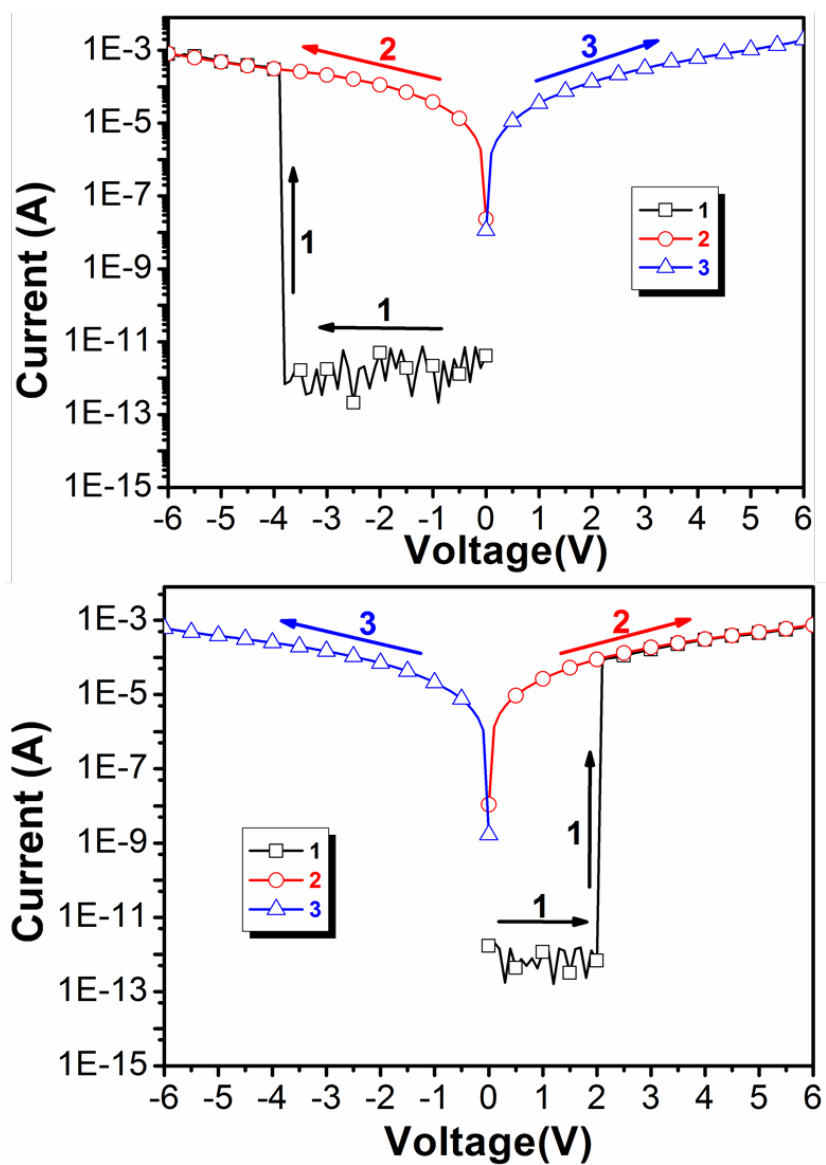

**Figure S8.** Current-voltage (I-V) characteristics of the ITO/3STP-50/Al memory device.

**Table S1.** Inherent Viscosities and GPC Data of **3SOH-6FPI**.

| Polymer          | $\eta_{\text{inh}}^a$<br>(dL/g) | $M_w^b$ | $M_n^b$ | PDI <sup>c</sup> |
|------------------|---------------------------------|---------|---------|------------------|
| <b>3SOH-6FPI</b> | 0.49                            | 103200  | 52800   | 1.95             |

<sup>a</sup> Measured at a polymer concentration of 0.5 g/dL in DMAc at 30 °C.

<sup>b</sup> Calibrated with polystyrene standards, using NMP as the eluent at a constant flow rate of 0.5 mL/min at 40 °C.

<sup>c</sup> Polydispersity index ( $M_w/M_n$ ).

**Table S2.** Solubility<sup>a</sup> of **3SOH-6FPI**.

| Polymer          | Solvents |      |     |      |                  |     |                   |
|------------------|----------|------|-----|------|------------------|-----|-------------------|
|                  | NMP      | DMAc | DMF | DMSO | <i>m</i> -cresol | THF | CHCl <sub>3</sub> |
| <b>3SOH-6FPI</b> | ++       | ++   | ++  | ++   | ++               | ++  | —                 |

<sup>a</sup> The qualitative solubility was tested with 10 mg of a sample in 1 mL of stirred solvent. (++) soluble at room temperature, (+) soluble on heating, (+—) partial soluble on heating, (—) insoluble even on heating.
